# Supplementary material for: A comparative study on leaf anatomy and photosynthetic characteristics of different growth stages of Horsfieldia hainanensis
Source: PeerJ journal article supplement (doi:10.7717/peerj.18640), 2024-12-13
Supplement: leaf_anatomical_parameters.xlsx [file leaf_anatomical_parameters.xlsx]

## Sheet: Sheet1
	Mature trees						Seedlings
Leaf thickness(LT,μm)	319.705	318.354	320.642	319.567	0.939155		253.182	250.125	256.593	253.3	2.64187
Upper epidermis thickness(UET,μm)	21.669	20.456	22.773	21.6327	0.94626		24.531	23.633	25.435	24.533	0.735665
Lower epidermis thickness(LET,μm)	14.699	14.401	15.001	14.7003	0.244951		24.361	23.363	25.377	24.367	0.822223
Palisade parenchyma thickness(PPT,μm)	139.325	138.174	140.401	139.3	0.909341		100.567	98.605	103.129	100.767	1.85232
Spongy parenchyma thickness(SPT,μm)	138.447	136.509	140.745	138.567	1.73142		110.537	108.469	112.695	110.567	1.72539
