# Supplementary material for: A comparative study on leaf anatomy and photosynthetic characteristics of different growth stages of Horsfieldia hainanensis
Source: PeerJ journal article supplement (doi:10.7717/peerj.18640), 2024-12-13
Supplement: leaf_photosynthetic_pigment_content.xlsx [file leaf_photosynthetic_pigment_content.xlsx]

## Sheet: Sheet1
	cn1			mean value			cn1-2			mean value			cn1-3			mean value			mean value
470	2.2512	2.2513	2.2513	2.25127			2.2375	2.2377	2.2308	2.23533			2.3448	2.3449	2.3449	2.34487		470	2.12644	0.147069
649	0.9147	0.9148	0.9141	0.914533			0.9098	0.9083	0.9088	0.908967			0.9621	0.9614	0.9615	0.961667		649	0.905583	0.0339726
665	1.5298	1.5287	1.528	1.52883			1.5114	1.5094	1.5094	1.51007			1.6248	1.6229	1.6218	1.62317		665	1.54225	0.0568036
	cn2						cn2-2						cn2-3				cn	chla	15.284
470	2.0994	2.0945	2.0946	2.09617			2.0897	2.0897	2.0849	2.0881			1.9471	1.947	1.947	1.94703		chlb	11.3141
649	0.9088	0.9082	0.9085	0.9085			0.894	0.8936	0.8936	0.893733			0.8464	0.846	0.8459	0.8461		chla+b	26.5981
665	1.5886	1.5875	1.5866	1.58757			1.5847	1.5832	1.5827	1.58353			1.525	1.5237	1.523	1.5239		Car	3.25002
																		Chl a/ b	1.35088
	cn3						cn3-2						cn3-3					Car/Chl a+b	0.12219
470	1.9235	1.9234	1.9201	1.92233			1.611	1.6112	1.6095				1.5321	1.5309	1.5309
649	0.7833	0.7827	0.7827				0.6247	0.6251	0.6248				0.6044	0.6049	0.6044
665	1.4399	1.4387	1.4375	1.4387			0.9988	0.9986	0.9978				0.9574	0.9572	0.9562
	ym1						ym1-2						ym1-3
470	1.1351	1.1347	1.1346	1.1348			1.1218	1.1226	1.122	1.12213			1.0856	1.0853	1.0842	1.08503		470	1.06727	0.0782765
649	0.4273	0.4274	0.4276	0.427433			0.4024	0.4025	0.4024	0.402433			0.3921	0.3918	0.3915	0.3918		649	0.37997	0.041253
665	0.7489	0.7488	0.7479	0.748533			0.7381	0.7379	0.7376	0.737867			0.7076	0.7068	0.7061	0.706833		665	0.721	0.0740826
	ym2						ym2-2						ym2-3				ym	chla	7.44375
470	0.7866	0.7872	0.7874				0.7906	0.79	0.7902				0.9122	0.9116	0.9113	0.9117		chlb	4.20634
649	0.3137	0.3128	0.3127	0.313067			0.3226	0.3218	0.3221	0.322167			0.3692	0.3689	0.3691	0.369067		chla+b	11.6501
665	0.6128	0.6113	0.6108	0.611633			0.6295	0.628	0.628	0.6285			0.7669	0.7664	0.7661	0.766467		Car	2.32294
																		Chl a/ b	1.76965
	ym3						ym3-2						ym3-3					Car/Chl a+b	0.199392
470	1.148	1.1509	1.1482	1.14903			1.065	1.0652	1.0648	1.065			1.0041	1.0031	1.0023	1.00317
649	0.4434	0.4434	0.4444	0.443733			0.3887	0.3887	0.3883	0.388567			0.3617	0.3617	0.361	0.361467
665	0.8696	0.8695	0.8691	0.8694			0.7511	0.7506	0.7497	0.750467			0.6697	0.6695	0.6687	0.6693
