# Supplementary material for: A comparative study on leaf anatomy and photosynthetic characteristics of different growth stages of Horsfieldia hainanensis
Source: PeerJ journal article supplement (doi:10.7717/peerj.18640), 2024-12-13
Supplement: stomatal_parameters.xlsx [file stomatal_parameters.xlsx]

## Sheet: Sheet1
μm	Lower epidermis length	Lower epidermis width	Number of pores	stomatal density	mean value	standard deviation		Stomatal length	mean value	standard deviation		Pore width	mean value	standard deviation
cn	569.93	385.76	23	104.614	95.2615	9.35235		15.47	14.5733	1.29647		4.49	3.24333	0.91069
	570.51	387.66	19	85.9091				15.51				2.34
								12.74				2.9
mm	0.56993	0.38576
	0.57051	0.38766
ym	571.59	387.44	25	112.889	106.233	6.65559		13.69	14.035	0.345		6.56	6.93	0.37
	571.64	386.49	22	99.5776				14.38				7.3
mm	0.57159	0.38744
	0.57164	0.38649
															Pore area	mean value	standard deviation
							cn	7.735				2.245			54.5263	37.3398	12.1545
								7.755				1.17			28.4903
								6.37				1.45			29.0026
							ym	6.845				3.28			70.498	76.4513	5.95328
								7.19				3.65			82.4046
